# Supplementary material for: Single-cell RNA-sequencing of PBMCs from SAVI patients reveals disease-associated monocytes with elevated integrated stress response
Source: PubMed Central journal article supplement — Cell Rep Med. 2023 Dec 19;4(12):101333. doi: 10.1016/j.xcrm.2023.101333 (PMC10772457; doi:10.1016/j.xcrm.2023.101333), 2023-12-19
Supplement: mmc1.pdf [file mmc1.pdf]

**Supplemental information**

**Single-cell RNA-sequencing of PBMCs from SAVI patients reveals disease-associated monocytes with elevated integrated stress response**

**Camille de Cevins, Laure Delage, Maxime Batignes, Quentin Riller, Marine Luka, Anne Remaury, Boris Sorin, Tinhinane Fali, Cécile Masson, Bénédicte Hoareau, Catherine Meunier, Mélanie Parisot, Mohammed Zarhrate, Briec P. Pérot, Víctor García-Paredes, Francesco Carbone, Lou Galliot, Béatrice Nal, Philippe Pierre, Luc Canard, Charlotte Boussard, Etienne Crickx, Jean-Claude Guillemot, Brigitte Bader-Meunier, Alexandre Bélot, Pierre Quartier, Marie-Louise Frémond, Bénédicte Neven, Galina Boldina, Franck Augé, Fischer Alain, Michel Didier, Frédéric Rieux-Laucat, and Mickaël M. Ménager**

**A Patient description**

| Patient | Correspondance in Frémond <i>et al</i> JACIP, 2021 | Other descriptions                                                                        |
|---------|----------------------------------------------------|-------------------------------------------------------------------------------------------|
| P1      | P1                                                 | P1 in Frémond <i>et al</i> JACI, 2016<br>Patient III-2 in Jeremiah <i>et al</i> JCI, 2014 |
| P2      | P3                                                 | Patient II-6 in Jeremiah <i>et al</i> JCI, 2014                                           |
| P4      | P9                                                 | N/A                                                                                       |
| P5      | P8                                                 | P2 in Frémond <i>et al</i> JACI, 2016,<br>Munoz <i>et al</i> JAMA Dermatol, 2015          |
| P6      | P5                                                 | P3 in Frémond <i>et al</i> JACI, 2016,<br>Case 1 in Picard <i>et al</i> Chest, 2016       |

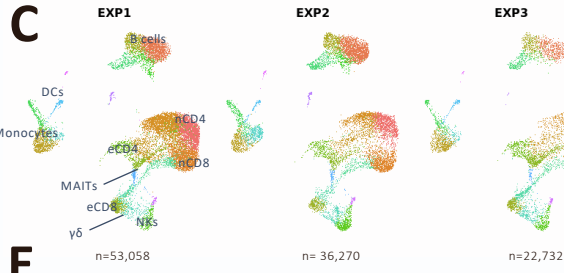

**E** Single cell clusters identification of SAVI dataset

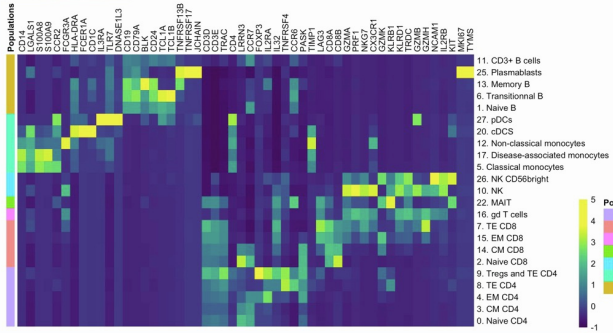

**G** Cell type proportions (scRNA-seq) in SAVI dataset

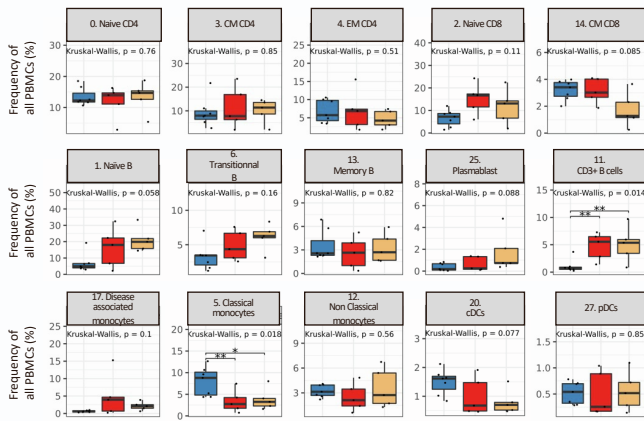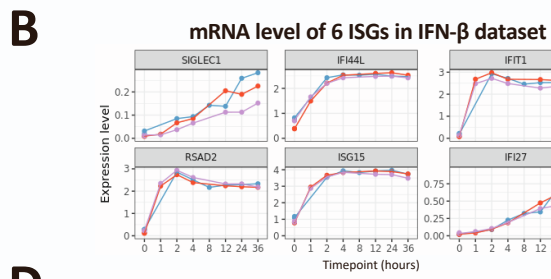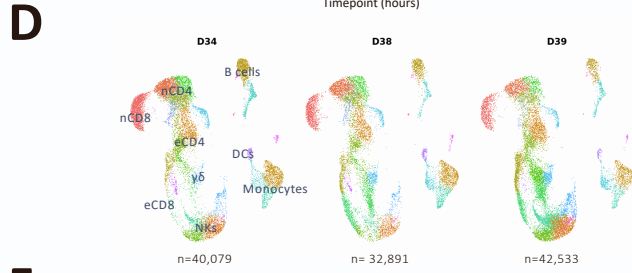

**F** Single cell clusters identification of IFN-β dataset

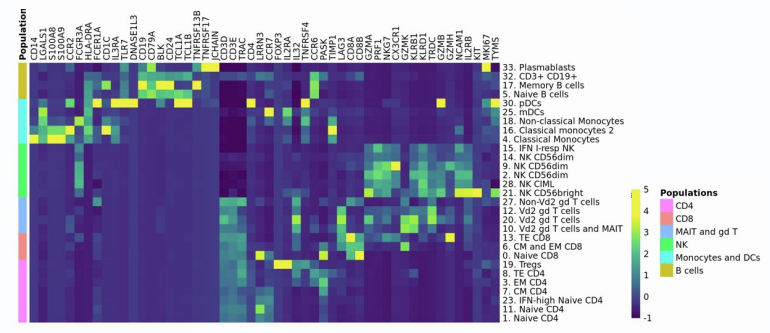

**H** Cell type proportions (scRNA-seq) in IFN-β dataset

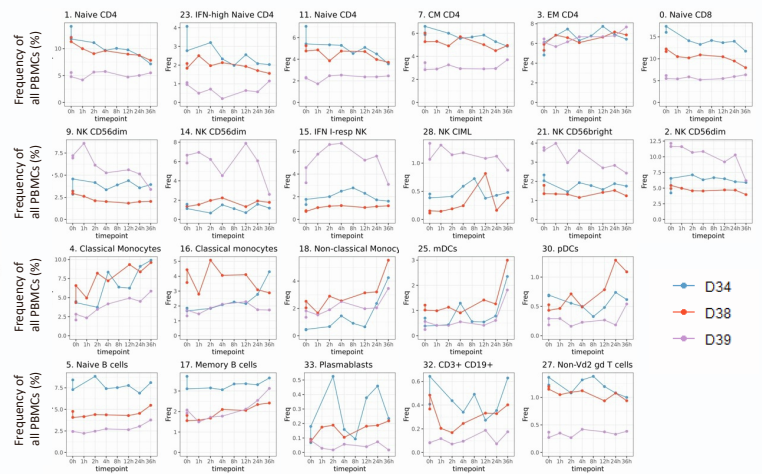

**J** Cell type proportions (CyTOF) in IFN-β dataset

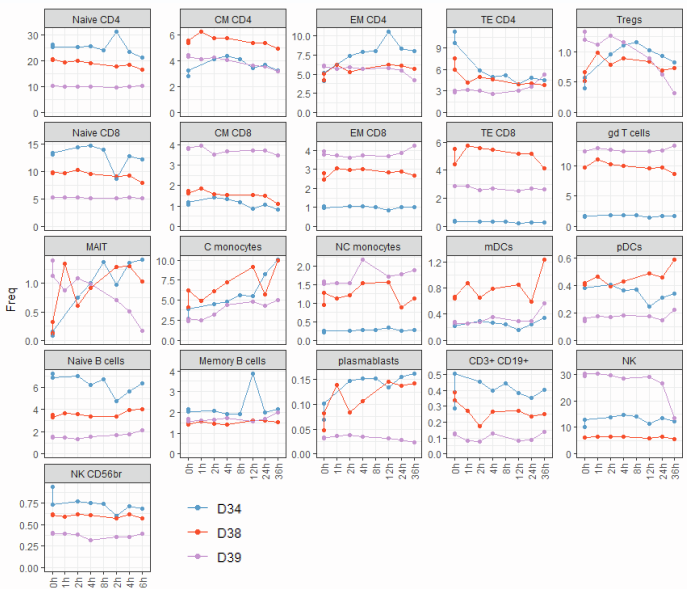

**I** Cell type proportions (flow cytometry) in SAVI dataset

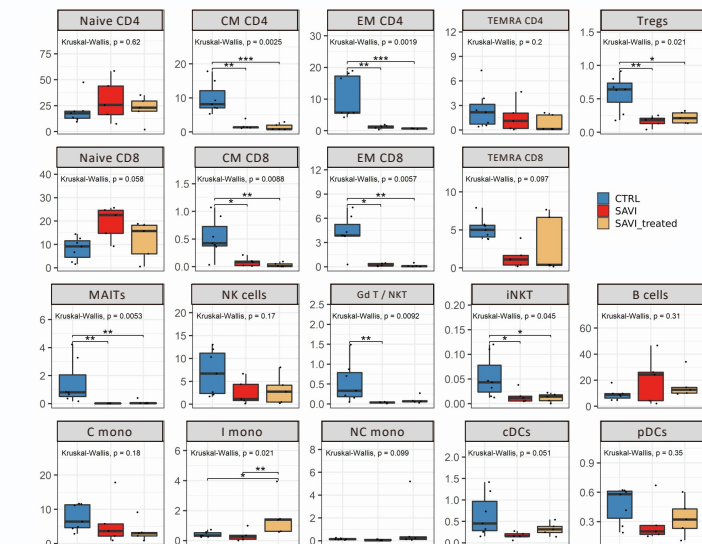

Figure S1

**Figure S1:** scRNA-seq and phenotyping of the SAVI dataset and the IFN- $\beta$  dataset. Related to Figure 1.

- A. The identification number of the SAVI patients in Frémond *et al*, 2021
- B. IFN- $\beta$  dataset: Validation of the IFN- $\beta$  stimulation using the mRNA levels measured by scRNA-seq of 6 well known IFN-stimulated genes
- C. UMAP of the SAVI dataset separated by batch. The number of cells in each group is indicated below the UMAP. nCD4: naïve CD4; eCD4: effector CD4; nCD8: naïve CD8; eCD8: effector CD8;  $\gamma\delta$ :  $\gamma\delta$  T cells
- D. UMAP of the IFN- $\beta$  dataset separated by donor. The number of cells in each group is indicated below the UMAP. nCD4: naïve CD4; eCD4: effector CD4; nCD8: naïve CD8; eCD8: effector CD8;  $\gamma\delta$ :  $\gamma\delta$  T cells
- E. Heatmap of the average expression of cell type markers in each cluster of the SAVI dataset. These markers were used to manually assign a cell type to each cluster
- F. Heatmap of the average expression of cell type markers in each cluster of the IFN- $\beta$  dataset. These markers were used to manually assign a cell type to each cluster.
- G. Boxplot of the proportion of PBMCs found each cluster of the SAVI dataset, by scRNA-seq.  $p$ -values are calculated by Kruskal-Wallis test for multiple comparisons, followed by a post hoc Dunn's test. \*( $p < 0.05$ ), \*\*( $p < 0.01$ ), \*\*\*( $p < 0.001$ )
- H. Evolution of the proportion of PBMCs found in each cluster of the IFN- $\beta$  dataset over the time course of IFN- $\beta$  stimulation, by scRNA-seq
- I. Boxplot of the proportion of PBMCs found each cell population of the SAVI dataset, by flow cytometry.  $p$ -values are calculated by Kruskal-Wallis test for multiple comparisons, followed by a post hoc Dunn's test. \*( $p < 0.05$ ), \*\*( $p < 0.01$ ), \*\*\*( $p < 0.001$ ). C mono: classical monocytes; I mono : intermediary monocytes; NC mono : non-classical monocytes.
- J. Evolution of the proportion of PBMCs found in each cluster of the IFN- $\beta$  dataset over the time course of IFN- $\beta$  stimulation, by Cytometry by Time of Flight

**A****Type I IFN signature score in SAVI dataset**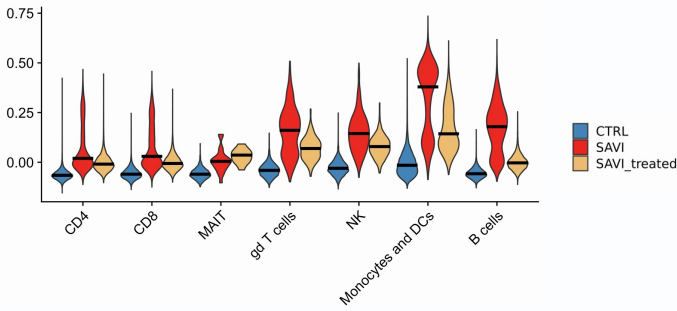**B****IFN signature score in IFN-β dataset**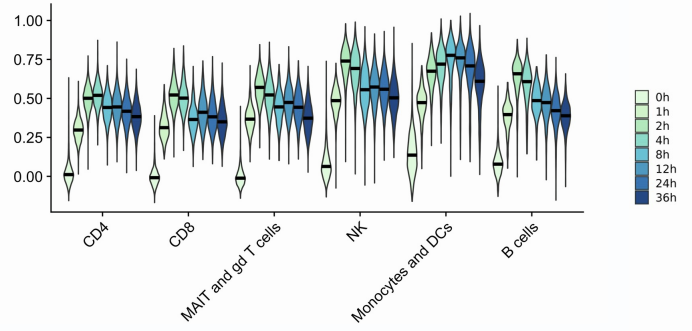**C****Pathway analysis in SAVI dataset :**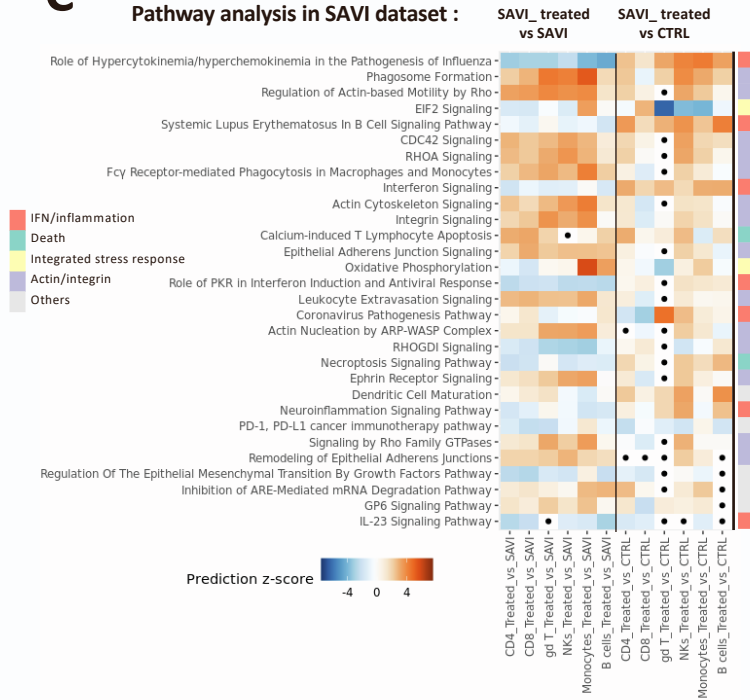**D****Pathway analysis in IFN-β dataset :**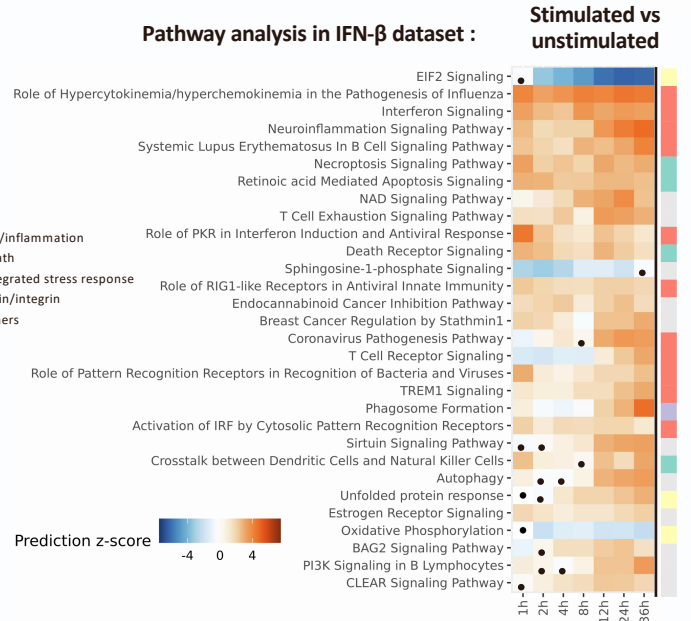

**Figure S2:** Pathway analysis in the SAVI dataset and the IFN- $\beta$  dataset. Related to Figure 2.

- A. Violin plot of a type I IFN response signature of 272 genes, in the SAVI dataset. Dark lines indicate medians
- B. Violin plot of a type I IFN response signature of 272 genes, in the IFN- $\beta$  dataset. Dark lines indicate medians
- C. Heatmap of the pathway enrichment analysis, performed in IPA, between SAVI\_treated and SAVI and between SAVI\_treated and CTRL in each cell compartment. Dots indicate non-significant pathways (Bonferroni-Hochberg corrected p-values  $> 0.05$ ). Side color bar indicate groups of pathways based on broader functions. Color scales indicate direction of prediction with orange for predicted activation and blue for predicted inhibition
- D. Heatmap of the pathway enrichment analysis, performed in IPA, between PBMCs stimulated with IFN- $\beta$  for each timepoint and unstimulated PBMCs. Dots indicate non-significant pathways (Bonferroni-Hochberg corrected p-values  $> 0.05$ ). Side color bar indicate groups of pathways based on broader functions. Color scales indicate direction of prediction with orange for predicted activation and blue for predicted inhibition

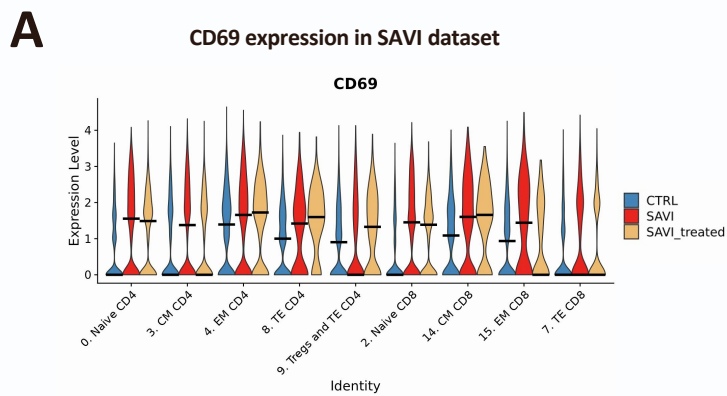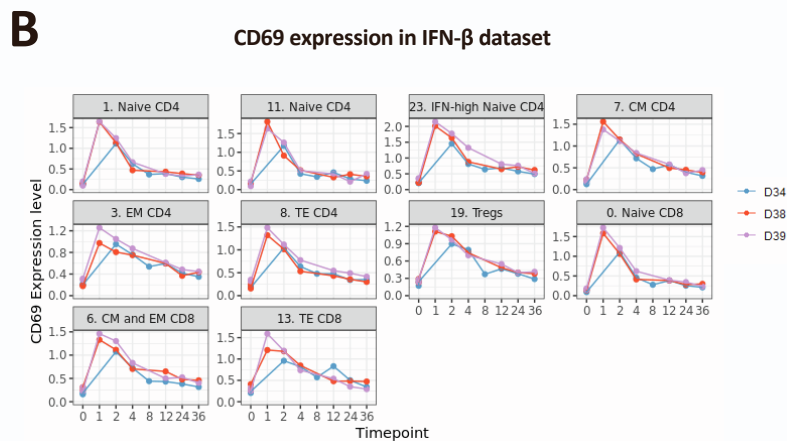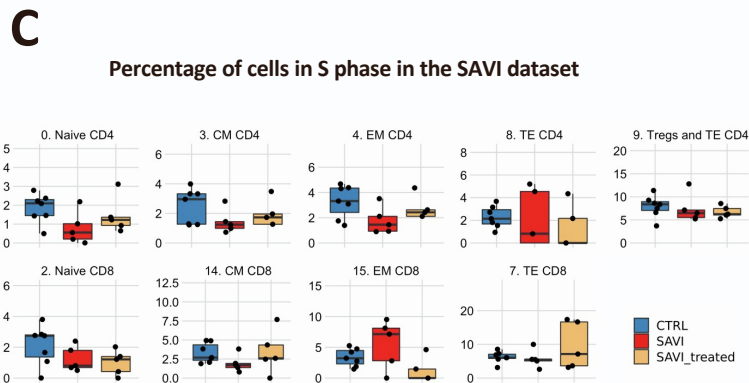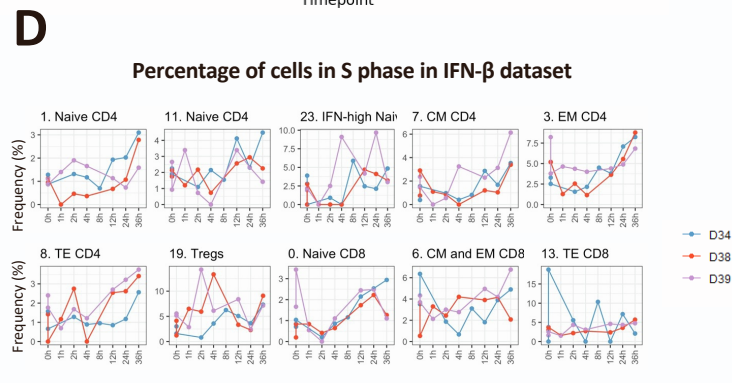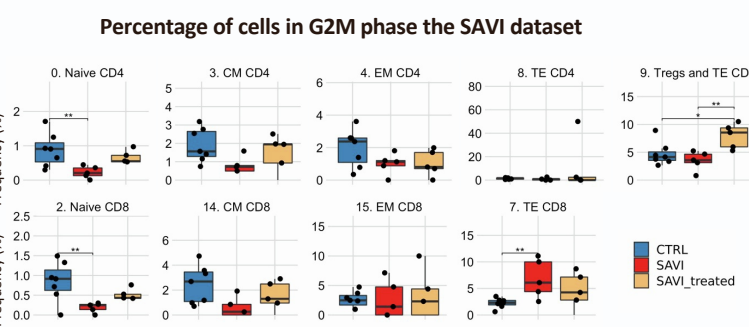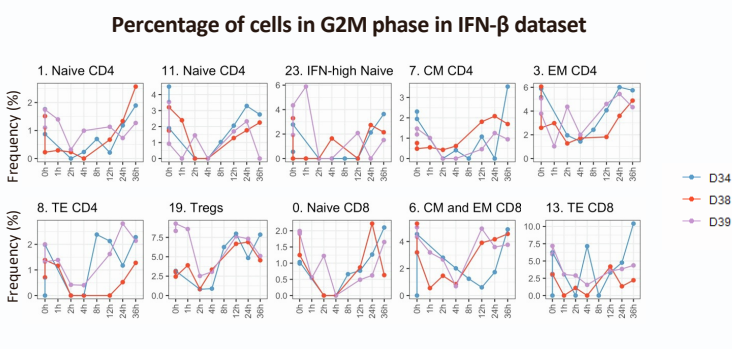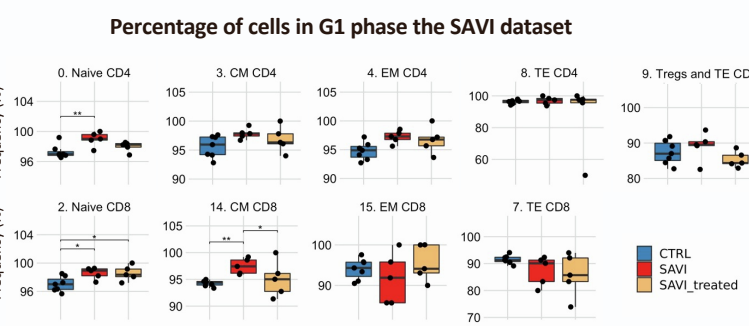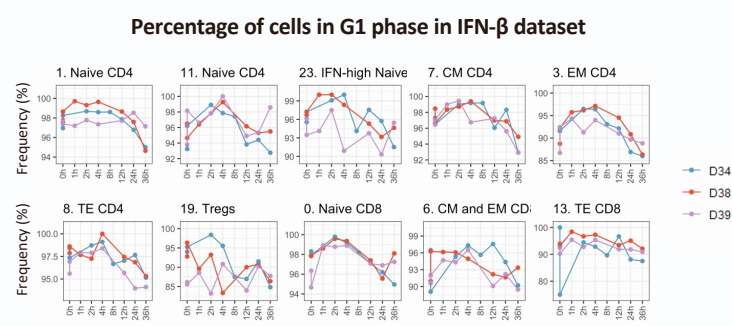

Figure S3

**Figure S3:** *CD69* expression and cell cycle phase at the transcriptomic level in CD4<sup>+</sup> and CD8<sup>+</sup> T cells the SAVI dataset and the IFN- $\beta$  dataset. Related to Figure 3.

- A. Violin plot of *CD69* expression, in CD4<sup>+</sup> and CD8<sup>+</sup> T cells of the SAVI dataset. Dark lines indicate medians
- B. Evolution of *CD69* expression in CD4<sup>+</sup> and CD8<sup>+</sup> T cells of the IFN- $\beta$  dataset over the time course of IFN- $\beta$  stimulation. Each dot is the average score of the signature for a sample
- C. Boxplot of the proportion of cells in the S phase (top), the G2M phase (middle), and the G1 phase (bottom) of the cell cycle, in CD4<sup>+</sup> and CD8<sup>+</sup> T cells of the SAVI dataset
- D. Evolution of the proportion of cells in the S phase (top) the G2M phase (middle), and the G1 phase (bottom) of the cell cycle in CD4<sup>+</sup> and CD8<sup>+</sup> T cells of the IFN- $\beta$  dataset over the time course of IFN- $\beta$  stimulation

### A Proportion of monocytes and DCs cell type in each group

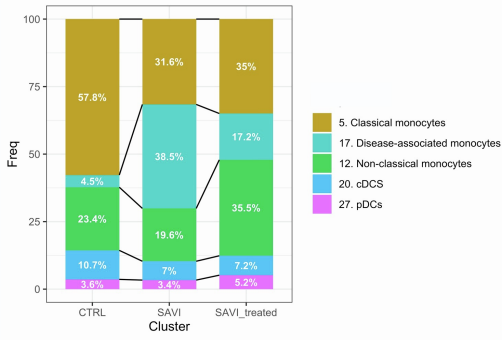

### B Type I and type III IFNs transcript levels in monocytes and DCs

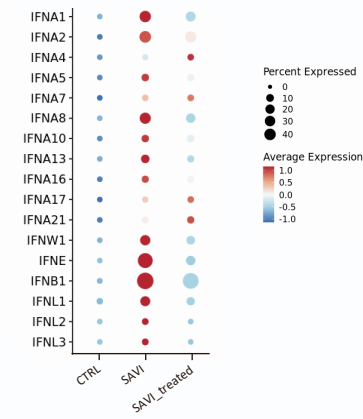

### C Type I and type III IFNs transcript levels in all groups

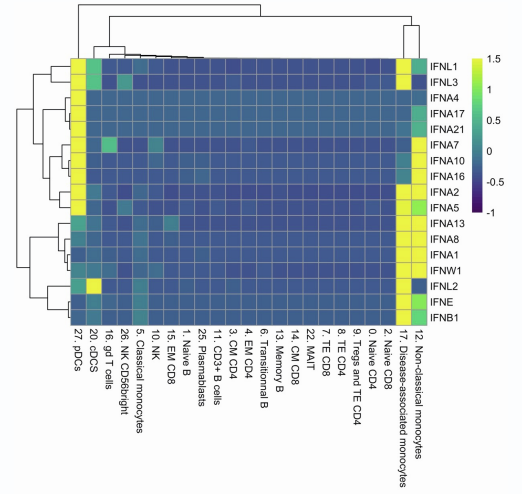

### D Pathway analysis : SAVI vs CTRL vs SAVI\_treated vs SAVI

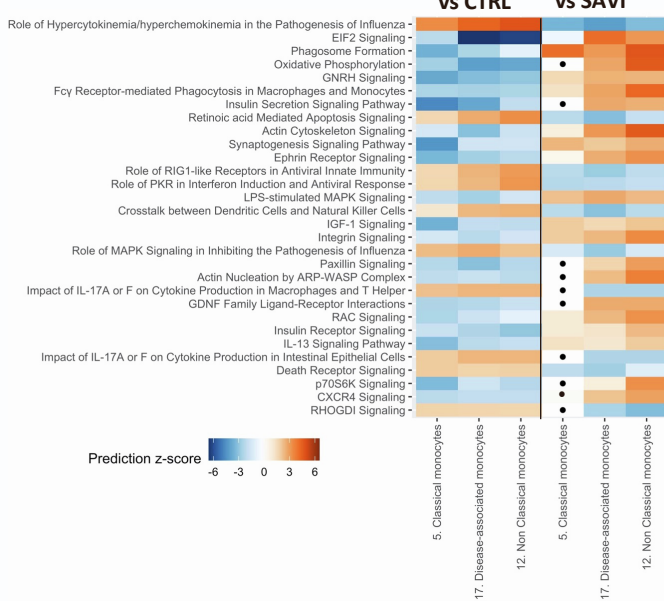

### E

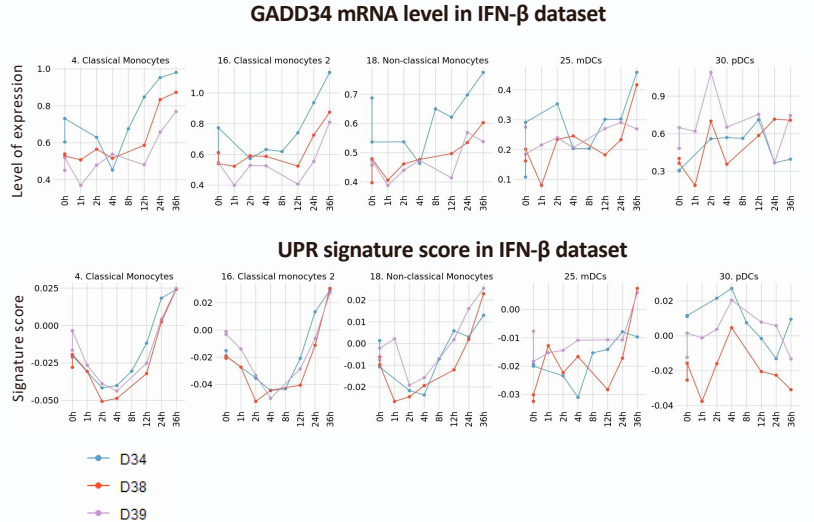



**Figure S4:** Further characterization of a disease-associated cluster of monocytes at the transcriptomic level.  
Related to Figure 4.

- A. Proportion of cells from each monocyte and dendritic cell clusters in each group in the SAVI dataset
- B. Dot plot of the scaled average expression of each type I and type III IFN in all monocytes and DCs clusters in each group of the SAVI dataset. Dot size indicates the percentage of cells expressing the gene and color scale indicates the average expression of the gene in each group.
- C. Heatmap of the scaled expression levels of all type I and type III IFN, in each cluster, in all cells of the SAVI dataset. Hierarchical clustering based on Euclidian distances.
- D. Heatmap of the pathway enrichment analysis, performed in IPA, between SAVI and CTRL, and between SAVI\_treated and SAVI in the clusters of the monocyte compartment. Dots indicate non-significant pathways ( $BH > 0.05$ )
- E. Evolution of the expression of *PPP1R15A* which codes for GADD34 (left) and of an unfolded protein response signature of 85 genes (right) in each monocyte or dendritic cell cluster of the IFN- $\beta$  dataset over the time course of IFN- $\beta$  stimulation. Each dot is the average score for a sample

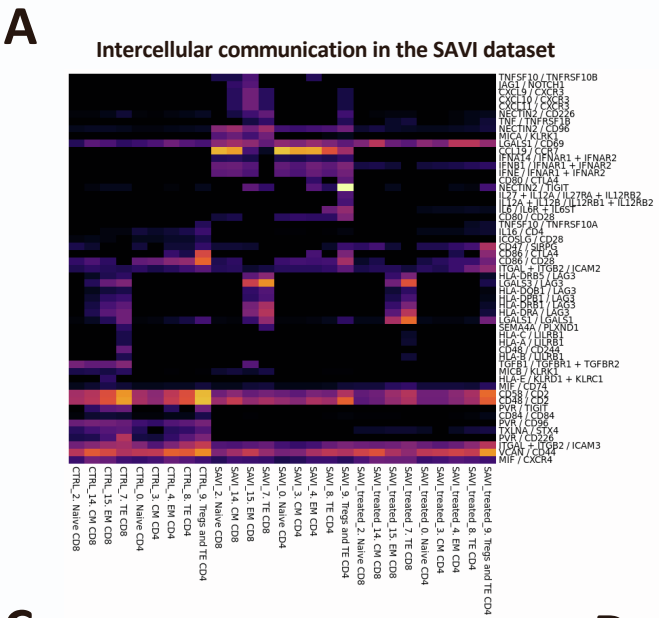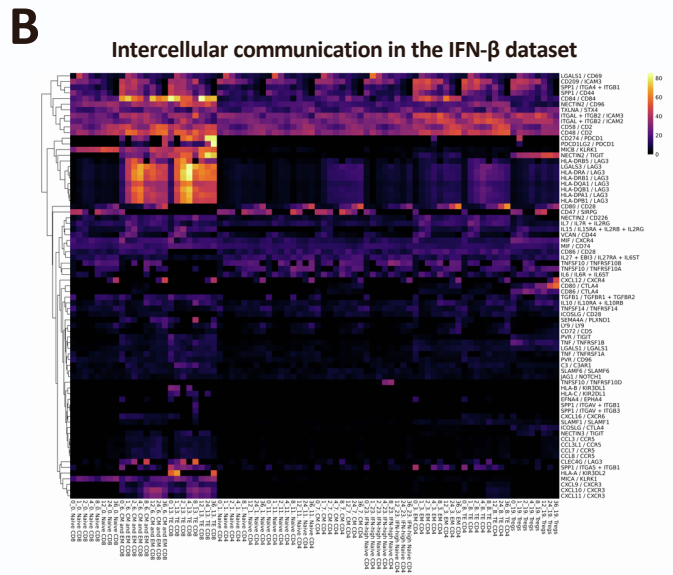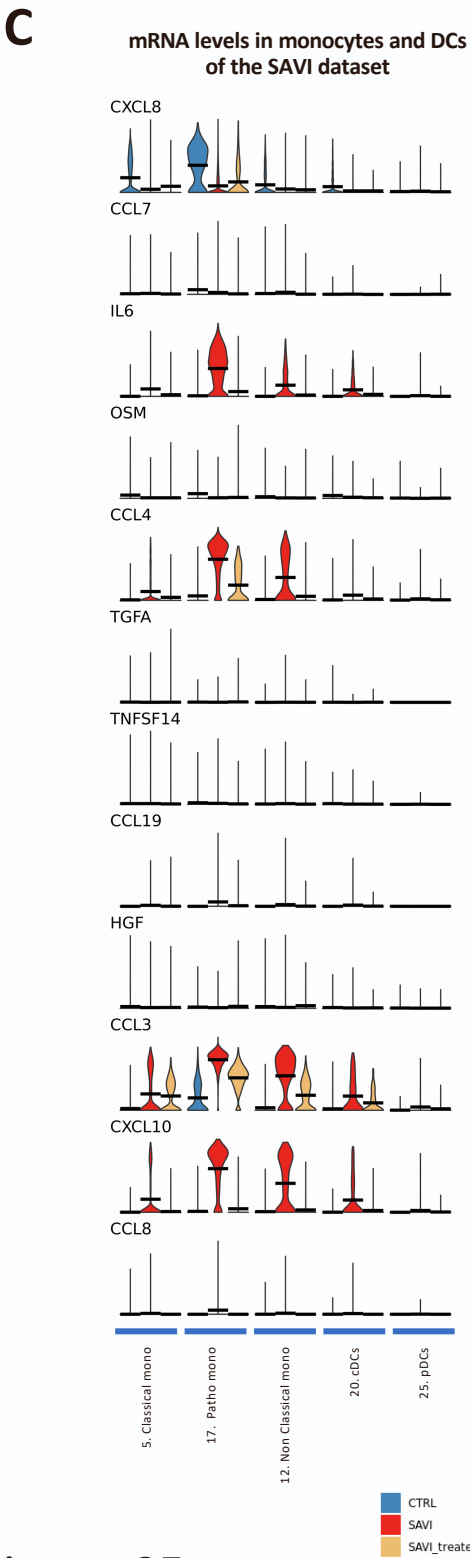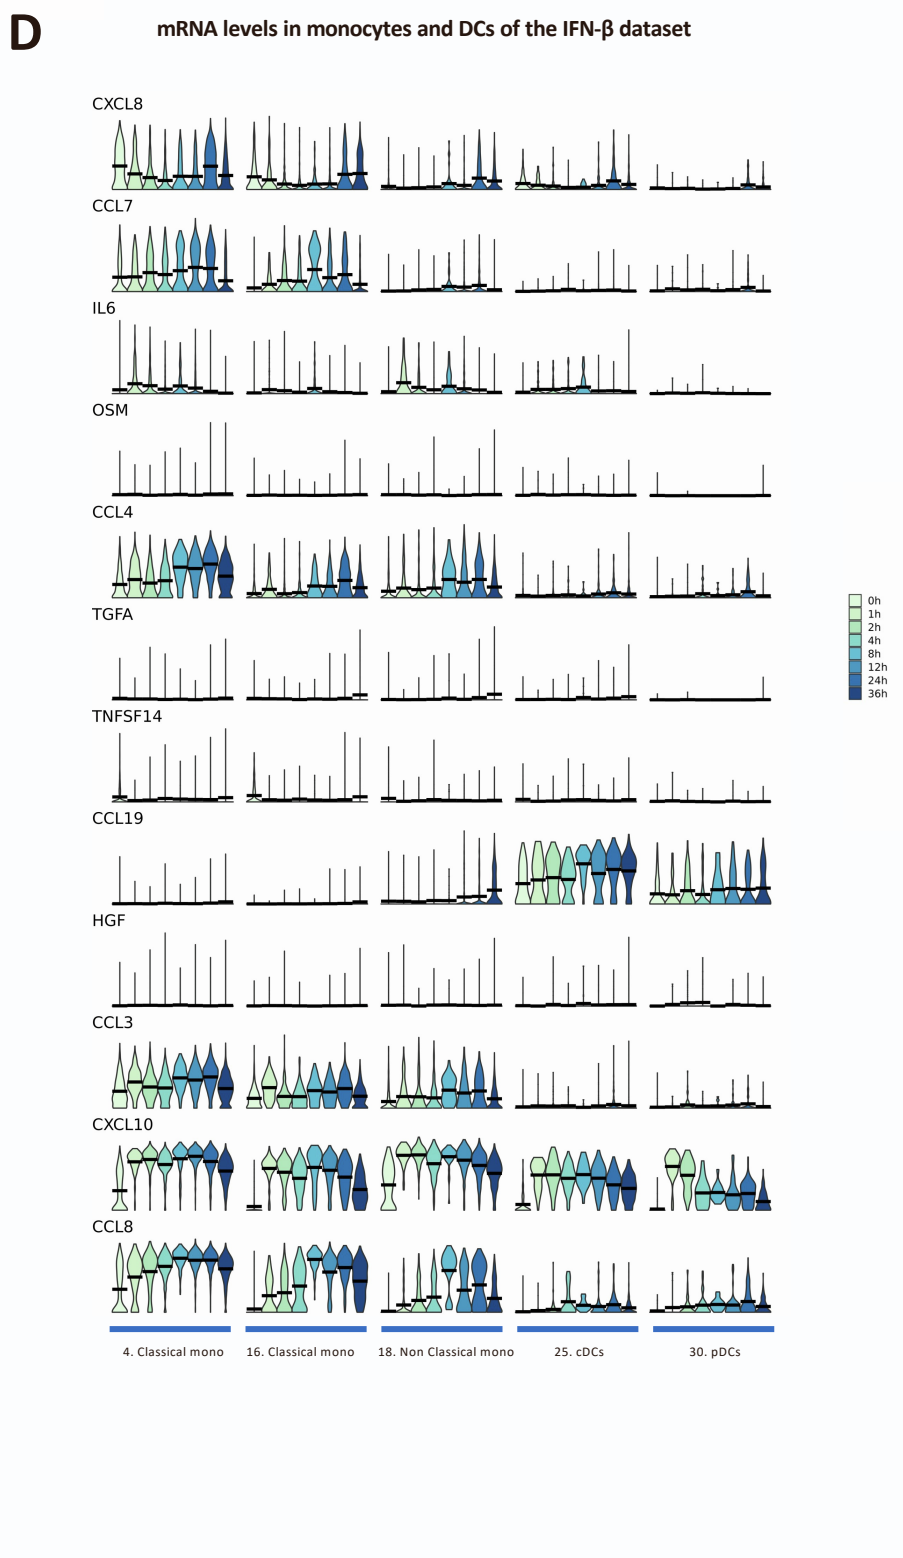

Figure S5

**Figure S5:** Ligand/receptors prediction and mRNA levels of secreted proteins. Related to Figure 5.

- A. Heatmap of the score of each ligand/receptor pair between each T cell cluster and the monocytes, either in the SAVI, the treated\_SAVI or the CTRL group
- B. Heatmap of the score of each ligand/receptor pair between each T cell cluster and the monocytes, for each timepoint of IFN- $\beta$  stimulation. Hierarchical clustering based on Pearson correlation
- C. Violin plot of the mRNA levels of the 12 proteins found upregulated in the blood of SAVI patients in Figure 5F, in each monocyte and DC clusters of the SAVI dataset
- D. Violin plot of the mRNA levels of the 12 proteins found upregulated in the blood of SAVI patients in Figure 5F, in each monocyte and DC clusters of the IFN- $\beta$  dataset

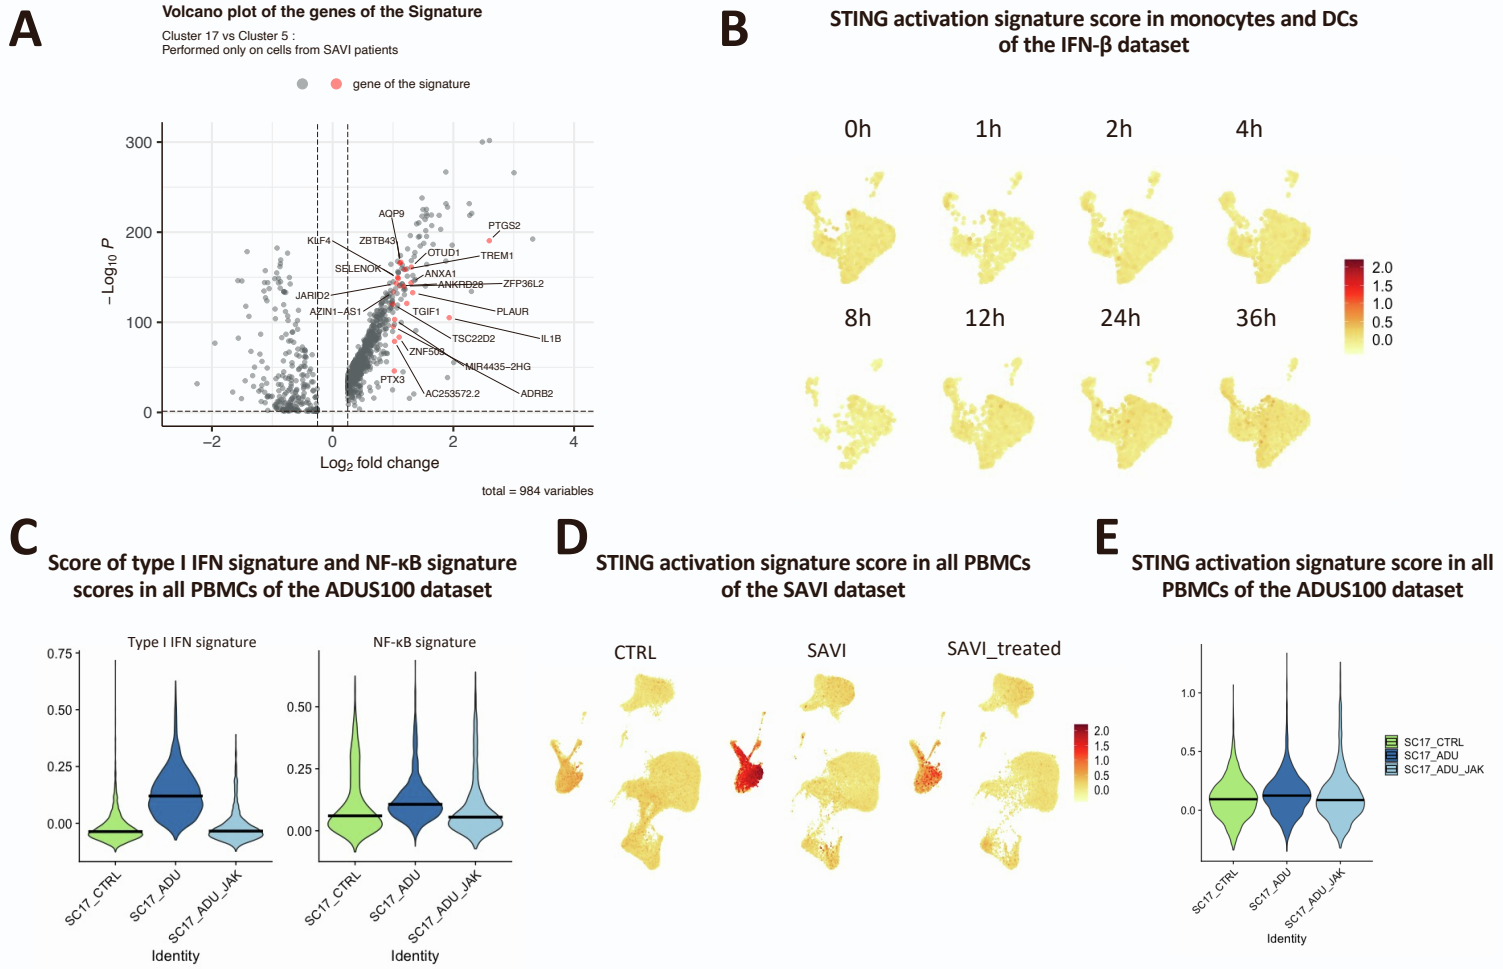

Figure S6

**Figure S6:** Design of a STING-activation signature, independent of type I IFN response. Related to Figure 6.

- A. Volcano plot of the DEGs between cluster 17 and cluster 5, in SAVI, with the 21 genes of the STING activation signature highlighted in red.
- B. Feature plot of the signature score of the 21 genes of the STING activation signature in the monocytes and DCs of each timepoint of the IFN- $\beta$  dataset
- C. Violin plots of the score of a type I IFN response signature of 272 genes and of an NF- $\kappa$ B activation signature of 200 genes in all PBMCs of CTRL, ADUS100 and ADUS100+JAK-inhibitor in the ADUS100 dataset. Dark lines indicate medians
- D. Feature plot of the signature score of the 21 genes of the STING activation signature in all PBMCs of CTRL, SAVI and SAVI\_treated in the SAVI dataset
- E. Violin plot of the signature score of the 21 genes of the STING activation signature in all PBMCs of CTRL, ADUS100 and ADUS100+JAK-inhibitor in the ADUS100 dataset. Dark lines indicate medians

### A UPR signature score in the IFN- $\beta$ dataset

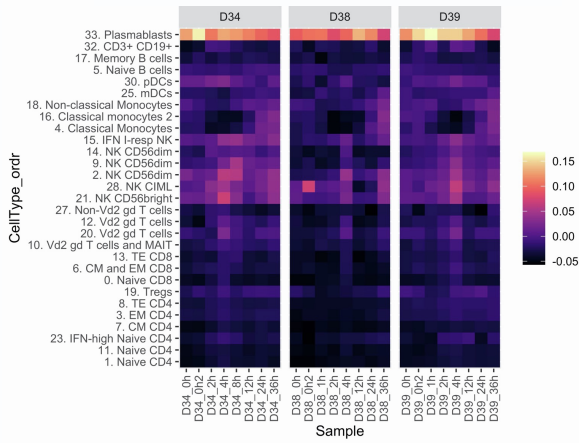

### B Senescence signature score in the SAVI dataset

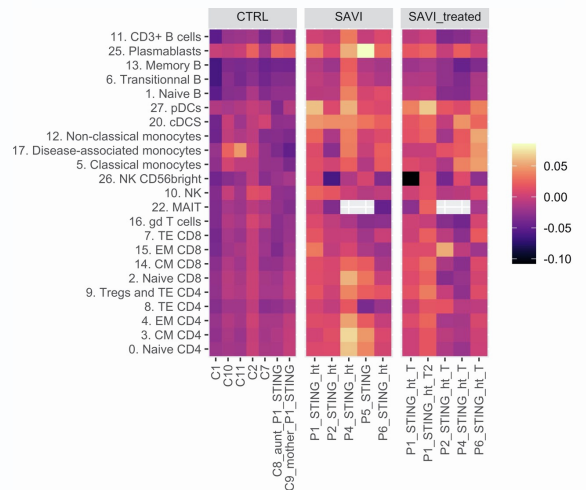

### C Type I IFN signature score in the SAVI dataset

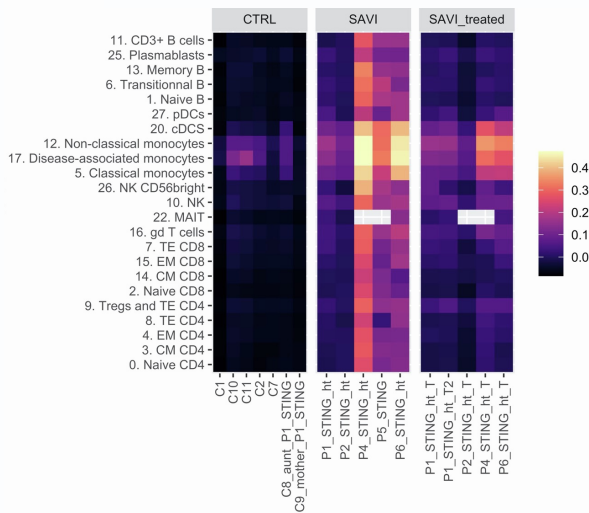

### D T cell activation signature score in the SAVI dataset

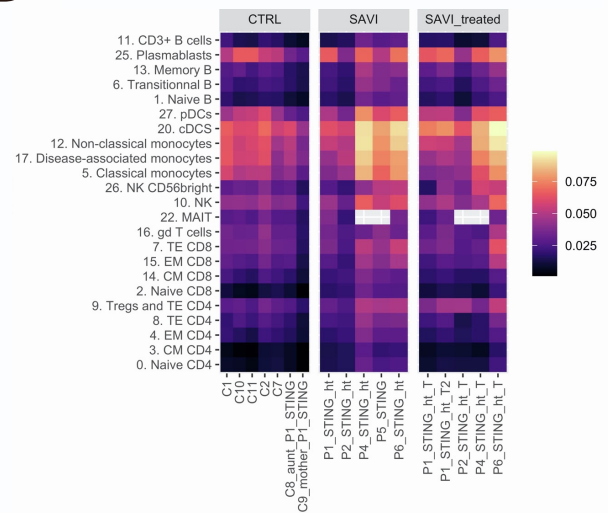

### E Genealogic tree of P1 and P2

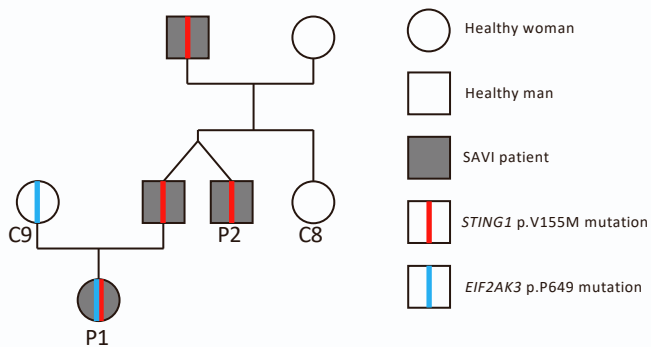

### F Sanger sequencing of PERK

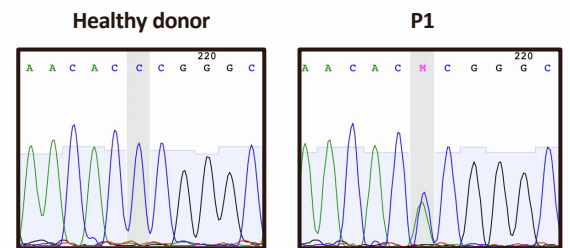

**Figure S7:** Transcriptomic profiles of signatures relevant to P1. Related to Figure 6.

- A. Heatmap of a UPR signature of 85 genes in each sample and each cluster of the IFN- $\beta$  dataset
- B. Heatmap of a senescence signature of 50 genes in each sample and each cluster of the SAVI dataset. Grey squares are used when no cells from a sample in found in a cluster.
- C. Heatmap of a type I IFN response signature of 272 genes in each sample and each cluster of the SAVI dataset. Grey squares are used when no cells from a sample in found in a cluster.
- D. Heatmap of a T cell activation signature of 4917 genes in each sample and each cluster of the SAVI dataset. Grey squares are used when no cells from a sample in found in a cluster.
- E. Genealogic tree of P1's family. Squares represent male individuals and rounds represent female individuals.
- F. Sanger sequencing of genomic DNA from SV40-fibroblasts of a healthy control and P1. The « M » stands for a heterozygous C>A variation.
